# Supplementary material
Source: PubMed Central journal article supplement (PMC1483024)
Supplement: mbc_E06-02-0135_6.pdf [file mbc_E06-02-0135_6.pdf]

Table S1: Yeast strains used in this study

| Strain  | Relevant Genotype                                                                                                                                                                                                                                                                                                                                                             | Source                   |
|---------|-------------------------------------------------------------------------------------------------------------------------------------------------------------------------------------------------------------------------------------------------------------------------------------------------------------------------------------------------------------------------------|--------------------------|
| DBY6529 | <i>MAT<math>\alpha</math></i> , <i>his3-<math>\Delta</math>200</i> , <i>leu2-<math>\Delta</math>1</i> , <i>trp1-<math>\Delta</math>63</i> , <i>ura3-52</i> , <i>aip1<math>\Delta</math>::LEU2</i>                                                                                                                                                                             | Amberg et al., 1995      |
| DBY6527 | <i>MAT<math>\alpha</math></i> , <i>his3-<math>\Delta</math>200</i> , <i>leu2-<math>\Delta</math>1</i> , <i>trp1-<math>\Delta</math>63</i> , <i>ura3-52</i> , <i>aip1<math>\Delta</math>::URA3</i>                                                                                                                                                                             | Amberg et al., 1995      |
| DDY1252 | <i>MAT<math>\alpha</math></i> , <i>his3<math>\Delta</math>200</i> , <i>leu2-3</i> , <i>112</i> , <i>lys2-801(oc)</i> , <i>uras-52</i> , <i>COF1::LEU2</i>                                                                                                                                                                                                                     | Lappalainen et al., 1997 |
| DDY1264 | <i>MAT<math>\alpha</math></i> , <i>his3-<math>\Delta</math>200</i> , <i>leu2-3</i> , <i>112</i> , <i>lys2-801(oc)</i> , <i>uras-52</i> , <i>cof1-19::LEU2</i>                                                                                                                                                                                                                 | Lappalainen et al., 1997 |
| DDY1266 | <i>MAT<math>\alpha</math></i> , <i>his3-<math>\Delta</math>200</i> , <i>leu2-3</i> , <i>112</i> , <i>lys2-801</i> , <i>ura3-52</i> , <i>cof1-22::LEU2</i>                                                                                                                                                                                                                     | Lappalainen et al., 1997 |
| R314    | <i>MAT<math>\alpha</math></i> , <i>pep4-3</i> , <i>prb1-122</i> , <i>ura3-52</i> , <i>leu2-3,112</i> , <i>reg1-501</i> , <i>gal1</i>                                                                                                                                                                                                                                          | Hovland et al., 1989     |
| Y190    | <i>MAT<math>\alpha</math></i> , <i>ura3-52</i> , <i>his3-<math>\Delta</math>200</i> , <i>lys2-801</i> , <i>ade2-101</i> , <i>trp1-901</i> , <i>leu2-3</i> , <i>112</i> , <i>gal4<math>\Delta</math></i> , <i>gal80<math>\Delta</math></i> , <i>URA3::GAL1<sub>UAS</sub>-GAL1<sub>TATA</sub>-lacZ</i> , <i>cyh'2</i> , <i>LYS2::GAL<sub>UAS</sub>-HIS3<sub>TATA</sub>-HIS3</i> | Flick et al., 1990       |
| Y187    | <i>MAT<math>\alpha</math></i> , <i>ura3-52</i> , <i>his3-<math>\Delta</math>200</i> , <i>ade2-101</i> , <i>trp1-901</i> , <i>leu2-3</i> , <i>112</i> , <i>met-</i> , <i>gal4<math>\Delta</math></i> , <i>gal80<math>\Delta</math></i> , <i>URA3::GAL1<sub>UAS</sub>-GAL1<sub>TATA</sub>-lacZ</i>                                                                              | Harper et al., 1993      |
| ABY944  | <i>MAT<math>\alpha</math></i> , <i>his3-<math>\Delta</math>200</i> , <i>leu2-3</i> , <i>112</i> , <i>lys2-801</i> , <i>trp1-1(am)</i> , <i>ura3-52</i> , <i>tpm1-2::LEU2</i> , <i>tpm2<math>\Delta</math>::HIS3</i>                                                                                                                                                           | Liu and Bretscher, 1998  |
| BGY24   | <i>MAT<math>\alpha</math></i> , <i>ade2-1</i> , <i>his3-11</i> , <i>15</i> , <i>leu2-3</i> , <i>112</i> , <i>trp1-1</i> , <i>ura3-52</i> , <i>cap2<math>\Delta</math>::HIS3</i>                                                                                                                                                                                               | Balcer et al., 2003      |
| BGY206  | <i>MAT<math>\alpha</math></i> , <i>ade2-101</i> , <i>his3-<math>\Delta</math>200</i> , <i>leu2-3</i> , <i>112</i> , <i>tpm1<math>\Delta</math>::LEU2</i>                                                                                                                                                                                                                      | Liu and Bretscher, 1998  |
| BGY779  | <i>MAT<math>\alpha</math></i> , <i>his3-<math>\Delta</math>200</i> , <i>leu2-<math>\Delta</math>1</i> , <i>trp1-<math>\Delta</math>63</i> , <i>ura3-52</i> , <i>aip1::KanMX</i>                                                                                                                                                                                               | this study               |
| BGY780  | <i>MAT<math>\alpha</math></i> , <i>his3-<math>\Delta</math>200</i> , <i>leu2-<math>\Delta</math>1</i> , <i>trp1-<math>\Delta</math>63</i> , <i>ura3-52</i> , <i>aip1-101::KanMX</i>                                                                                                                                                                                           | this study               |
| BGY781  | <i>MAT<math>\alpha</math></i> , <i>his3-<math>\Delta</math>200</i> , <i>leu2-<math>\Delta</math>1</i> , <i>trp1-<math>\Delta</math>63</i> , <i>ura3-52</i> , <i>aip1-102::KanMX</i>                                                                                                                                                                                           | this study               |
| BGY782  | <i>MAT<math>\alpha</math></i> , <i>his3-<math>\Delta</math>200</i> , <i>leu2-<math>\Delta</math>1</i> , <i>trp1-<math>\Delta</math>63</i> , <i>ura3-52</i> , <i>aip1-103::KanMX</i>                                                                                                                                                                                           | this study               |
| BGY783  | <i>MAT<math>\alpha</math></i> , <i>his3-<math>\Delta</math>200</i> , <i>leu2-<math>\Delta</math>1</i> , <i>trp1-<math>\Delta</math>63</i> , <i>ura3-52</i> , <i>aip1-104::KanMX</i>                                                                                                                                                                                           | this study               |
| BGY784  | <i>MAT<math>\alpha</math></i> , <i>his3-<math>\Delta</math>200</i> , <i>leu2-<math>\Delta</math>1</i> , <i>trp1-<math>\Delta</math>63</i> , <i>ura3-52</i> , <i>aip1-105::KanMX</i>                                                                                                                                                                                           | this study               |
| BGY785  | <i>MAT<math>\alpha</math></i> , <i>his3-<math>\Delta</math>200</i> , <i>leu2-<math>\Delta</math>1</i> , <i>trp1-<math>\Delta</math>63</i> , <i>ura3-52</i> , <i>aip1-106::KanMX</i>                                                                                                                                                                                           | this study               |
| BGY786  | <i>MAT<math>\alpha</math></i> , <i>his3-<math>\Delta</math>200</i> , <i>leu2-<math>\Delta</math>1</i> , <i>trp1-<math>\Delta</math>63</i> , <i>ura3-52</i> , <i>aip1-107::KanMX</i>                                                                                                                                                                                           | this study               |
| BGY787  | <i>MAT<math>\alpha</math></i> , <i>his3-<math>\Delta</math>200</i> , <i>leu2-<math>\Delta</math>1</i> , <i>trp1-<math>\Delta</math>63</i> , <i>ura3-52</i> , <i>aip1-108::KanMX</i>                                                                                                                                                                                           | this study               |
| BGY788  | <i>MAT<math>\alpha</math></i> , <i>his3-<math>\Delta</math>200</i> , <i>leu2-<math>\Delta</math>1</i> , <i>trp1-<math>\Delta</math>63</i> , <i>ura3-52</i> , <i>aip1-109::KanMX</i>                                                                                                                                                                                           | this study               |
| BGY789  | <i>MAT<math>\alpha</math></i> , <i>his3-<math>\Delta</math>200</i> , <i>leu2-<math>\Delta</math>1</i> , <i>trp1-<math>\Delta</math>63</i> , <i>ura3-52</i> , <i>aip1-110::KanMX</i>                                                                                                                                                                                           | this study               |
| BGY790  | <i>MAT<math>\alpha</math></i> , <i>his3-<math>\Delta</math>200</i> , <i>leu2-<math>\Delta</math>1</i> , <i>trp1-<math>\Delta</math>63</i> , <i>ura3-52</i> , <i>aip1 111::KanMX</i>                                                                                                                                                                                           | this study               |
| BGY791  | <i>MAT<math>\alpha</math></i> , <i>his3-<math>\Delta</math>200</i> , <i>leu2-<math>\Delta</math>1</i> , <i>trp1-<math>\Delta</math>63</i> , <i>ura3-52</i> , <i>aip1-112::KanMX</i>                                                                                                                                                                                           | this study               |
| BGY792  | <i>MAT<math>\alpha</math></i> , <i>his3-<math>\Delta</math>200</i> , <i>leu2-<math>\Delta</math>1</i> , <i>trp1-<math>\Delta</math>63</i> , <i>ura3-52</i> , <i>aip1 113::KanMX</i>                                                                                                                                                                                           | this study               |
| BGY793  | <i>MAT<math>\alpha</math></i> , <i>his3-<math>\Delta</math>200</i> , <i>leu2-<math>\Delta</math>1</i> , <i>trp1-<math>\Delta</math>63</i> , <i>ura3-52</i> , <i>aip1-114::KanMX</i>                                                                                                                                                                                           | this study               |
| BGY794  | <i>MAT<math>\alpha</math></i> , <i>his3-<math>\Delta</math>200</i> , <i>leu2-<math>\Delta</math>1</i> , <i>trp1-<math>\Delta</math>63</i> , <i>ura3-52</i> , <i>aip1-115::KanMX</i>                                                                                                                                                                                           | this study               |
| BGY795  | <i>MAT<math>\alpha</math></i> , <i>his3-<math>\Delta</math>200</i> , <i>leu2-<math>\Delta</math>1</i> , <i>trp1-<math>\Delta</math>63</i> , <i>ura3-52</i> , <i>aip1 116::KanMX</i>                                                                                                                                                                                           | this study               |
| BGY796  | <i>MAT<math>\alpha</math></i> , <i>his3-<math>\Delta</math>200</i> , <i>leu2-<math>\Delta</math>1</i> , <i>trp1-<math>\Delta</math>63</i> , <i>ura3-52</i> , <i>aip1-117::KanMX</i>                                                                                                                                                                                           | this study               |
| BGY797  | <i>MAT<math>\alpha</math></i> , <i>his3-<math>\Delta</math>200</i> , <i>leu2-<math>\Delta</math>1</i> , <i>trp1-<math>\Delta</math>63</i> , <i>ura3-52</i> , <i>aip1-118::KanMX</i>                                                                                                                                                                                           | this study               |
| BGY798  | <i>MAT<math>\alpha</math></i> , <i>his3-<math>\Delta</math>200</i> , <i>leu2-<math>\Delta</math>1</i> , <i>trp1-<math>\Delta</math>63</i> , <i>ura3-52</i> , <i>aip1-119::KanMX</i>                                                                                                                                                                                           | this study               |
| BGY799  | <i>MAT<math>\alpha</math></i> , <i>his3-<math>\Delta</math>200</i> , <i>leu2-<math>\Delta</math>1</i> , <i>trp1-<math>\Delta</math>63</i> , <i>ura3-52</i> , <i>N-aip1::KanMX</i>                                                                                                                                                                                             | this study               |
| BGY901  | <i>MAT<math>\alpha</math></i> , <i>his3-<math>\Delta</math>200</i> , <i>leu2-<math>\Delta</math>1</i> , <i>trp1-<math>\Delta</math>63</i> , <i>ura3-52</i> , <i>C-aip1::KanMX</i>                                                                                                                                                                                             | this study               |
| BGY592  | <i>MAT<math>\alpha</math></i> , <i>his3-<math>\Delta</math>200</i> , <i>leu2-<math>\Delta</math>1</i> , <i>trp1-<math>\Delta</math>63</i> , <i>ura3-52</i> , <i>aip1-107/108::KanMX</i>                                                                                                                                                                                       | this study               |
| BGY593  | <i>MAT<math>\alpha</math></i> , <i>his3-<math>\Delta</math>200</i> , <i>leu2-<math>\Delta</math>1</i> , <i>trp1-<math>\Delta</math>63</i> , <i>ura3-52</i> , <i>aip1-108/109::KanMX</i>                                                                                                                                                                                       | this study               |
| BGY595  | <i>MAT<math>\alpha</math></i> , <i>his3-<math>\Delta</math>200</i> , <i>leu2-<math>\Delta</math>1</i> , <i>trp1-<math>\Delta</math>63</i> , <i>ura3-52</i> , <i>aip1-107/119::KanMX</i>                                                                                                                                                                                       | this study               |
| BGY596  | <i>MAT<math>\alpha</math></i> , <i>his3-<math>\Delta</math>200</i> , <i>leu2-<math>\Delta</math>1</i> , <i>trp1-<math>\Delta</math>63</i> , <i>ura3-52</i> , <i>aip1-108/119::KanMX</i>                                                                                                                                                                                       | this study               |
| BGY597  | <i>MAT<math>\alpha</math></i> , <i>his3-<math>\Delta</math>200</i> , <i>leu2-<math>\Delta</math>1</i> , <i>trp1-<math>\Delta</math>63</i> , <i>ura3-52</i> , <i>aip1-109/119::KanMX</i>                                                                                                                                                                                       | this study               |
