# Supplementary material
Source: PubMed Central journal article supplement (PMC1483024)
Supplement: mbc_E06-02-0135_7.pdf [file mbc_E06-02-0135_7.pdf]

Table S2: Plasmids used in this study

| Insert              | Integration plasmid |                             | Expression Plasmid |         | Two-hybrid Plasmid |         | Reference             |
|---------------------|---------------------|-----------------------------|--------------------|---------|--------------------|---------|-----------------------|
|                     | Name                | Vector                      | Name               | Vector  | Name               | Vector  |                       |
| <i>KanMX6</i>       | pML1                | pFA6a                       |                    |         |                    |         | Longtine et al., 1998 |
| <i>AIP1</i>         | pBG363              | pBluescript SK <sup>-</sup> | pBG003             | pEG(KT) | pBG606             | pGBKT7  | this study            |
| <i>aip1-101</i>     | pBG364              | pBluescript SK <sup>-</sup> | pBG403             | pEG(KT) | pBG607             | pGBKT7  | this study            |
| <i>aip1-102</i>     | pBG365              | pBluescript SK <sup>-</sup> | pBG404             | pEG(KT) | pBG608             | pGBKT7  | this study            |
| <i>aip1-103</i>     | pBG366              | pBluescript SK <sup>-</sup> | pBG405             | pEG(KT) |                    |         | this study            |
| <i>aip1-104</i>     | pBG367              | pBluescript SK <sup>-</sup> | pBG406             | pEG(KT) | pBG610             | pGBKT7  | this study            |
| <i>aip1-105</i>     | pBG368              | pBluescript SK <sup>-</sup> | pBG407             | pEG(KT) | pBG611             | pGBKT7  | this study            |
| <i>aip1-106</i>     | pBG369              | pBluescript SK <sup>-</sup> | pBG408             | pEG(KT) | pBG612             | pGBKT7  | this study            |
| <i>aip1-107</i>     | pBG370              | pBluescript SK <sup>-</sup> | pBG409             | pEG(KT) | pBG613             | pGBKT7  | this study            |
| <i>aip1-108</i>     | pBG371              | pBluescript SK <sup>-</sup> | pBG410             | pEG(KT) | pBG614             | pGBKT7  | this study            |
| <i>aip1-109</i>     | pBG372              | pBluescript SK <sup>-</sup> | pBG411             | pEG(KT) | pBG615             | pGBKT7  | this study            |
| <i>aip1-110</i>     | pBG373              | pBluescript SK <sup>-</sup> | pBG412             | pEG(KT) | pBG616             | pGBKT7  | this study            |
| <i>aip1-111</i>     | pBG374              | pBluescript SK <sup>-</sup> | pBG413             | pEG(KT) | pBG617             | pGBKT7  | this study            |
| <i>aip1-112</i>     | pBG375              | pBluescript SK <sup>-</sup> | pBG414             | pEG(KT) | pBG618             | pGBKT7  | this study            |
| <i>aip1-113</i>     | pBG376              | pBluescript SK <sup>-</sup> | pBG415             | pEG(KT) | pBG619             | pGBKT7  | this study            |
| <i>aip1-114</i>     | pBG377              | pBluescript SK <sup>-</sup> | pBG416             | pEG(KT) | pBG620             | pGBKT7  | this study            |
| <i>aip1-115</i>     | pBG378              | pBluescript SK <sup>-</sup> | pBG417             | pEG(KT) | pBG621             | pGBKT7  | this study            |
| <i>aip1-116</i>     | pBG379              | pBluescript SK <sup>-</sup> | pBG418             | pEG(KT) | pBG622             | pGBKT7  | this study            |
| <i>aip1-117</i>     | pBG380              | pBluescript SK <sup>-</sup> | pBG419             | pEG(KT) | pBG623             | pGBKT7  | this study            |
| <i>aip1-118</i>     | pBG381              | pBluescript SK <sup>-</sup> | pBG420             | pEG(KT) | pBG624             | pGBKT7  | this study            |
| <i>aip1-119</i>     | pBG382              | pBluescript SK <sup>-</sup> | pBG421             | pEG(KT) | pBG625             | pGBKT7  | this study            |
| <i>aip1-120</i>     | pBG383              | pBluescript SK <sup>-</sup> | pBG422             | pEG(KT) | pBG626             | pGBKT7  | this study            |
| <i>aip1-121</i>     | pBG443              | pBluescript SK <sup>-</sup> | pBG423             | pEG(KT) | pBG627             | pGBKT7  | this study            |
| <i>aip1-107/108</i> | pBG592              | pBluescript SK <sup>-</sup> |                    |         |                    |         | this study            |
| <i>aip1-108/109</i> | pBG593              | pBluescript SK <sup>-</sup> |                    |         |                    |         | this study            |
| <i>aip1/107/119</i> | pBG595              | pBluescript SK <sup>-</sup> |                    |         |                    |         | this study            |
| <i>aip1/108/119</i> | pBG596              | pBluescript SK <sup>-</sup> |                    |         |                    |         | this study            |
| <i>aip1-109/119</i> | pBG597              | pBluescript SK <sup>-</sup> |                    |         |                    |         | this study            |
| <i>PFY1</i>         |                     |                             | pMW172             | pET     |                    |         | Eads et al., 1998     |
| <i>ACT1</i>         |                     |                             |                    |         | pBG200             | pDAb1   | Amberg et al., 1995   |
| <i>ACT1</i>         |                     |                             |                    |         | pBG503             | pACT II | Amberg et al., 1995   |
| <i>COF1</i>         |                     |                             |                    |         | pBG504             | pACT II | Amberg et al., 1995   |
