# Supplementary material
Source: PubMed Central journal article supplement (PMC1483024)
Supplement: mbc_E06-02-0135_8.pdf [file mbc_E06-02-0135_8.pdf]

Table S3: Primers used in this study

| Name   | Plasmid               | Sequence (5' to 3')                                                                      | Specific Restriction Site |
|--------|-----------------------|------------------------------------------------------------------------------------------|---------------------------|
| BGO480 | pBG363                | GCGCGCAAGCTTCGAGGTATGTAGGTCACAGAACG                                                      | Hind III                  |
| BGO481 | pBG363                | GCGCGCCC GCGGCCCTCTTCTTCGTCCACGTGC                                                       | Sac II                    |
| BGO482 | pBG363                | CACTGTTTTTACCACAGTCGGATCCGCGCACTAGTCATATAAACTTGTAATTATTACCCG                             | Spe I                     |
| BGO483 | pBG363                | CGGGTAATAATTACAAGTTTATATGACTAGTGCGCGGATCCGACTGTGGTAAAAACAGTG                             | BamH I                    |
| BGO493 | pBG364                | CCACCTCAGCCTAGTACTCAGGCTAACTTTACTACGCATTTATC                                             | Sca I                     |
| BGO494 | pBG364                | GATAAATCGGTAGTAAAGTTAGCCTGAGTACTAGGCTGAGGTGG                                             | Sca I                     |
| BGO495 | pBG365                | CTGTTGAAGTGAATGCTGCGTCTGAATTCCAAG                                                        | Bsm I                     |
| BGO496 | pBG365                | CTTGGAATTCAGACGCAGCATTCACTTCAACAG                                                        | Bsm I                     |
| BGO497 | pBG366                | CTCTGGGATTTTGCCGGCCGAAGACTCTGCG                                                          | Nae I                     |
| BGO498 | pBG366                | CGCAGAGTCTTCGGCCGGCAAAATCCCAGGAG                                                         | Nae I                     |
| BGO499 | pBG367                | GCGTTGTGGGAGCAGGTGCTGCTAACTTTGGTGTTTTC                                                   | AlwN I                    |
| BGO500 | pBG367                | GAAAACACCAAAGTTAGCAGCACCTGCTCCCACAACGC                                                   | AlwN I                    |
| BGO501 | pBG368                | GAAGGTCGTGATAACGCTGGCGTCTTCATATCCTGGGATTC                                                | BsaH I                    |
| BGO502 | pBG368                | GAATCCCAGGATATGAAGACGCCAGCGTTATCACGACCTTC                                                | BsaH I                    |
| BGO503 | pBG369                | CTTGTCATTTGAAGCAAAGTGCACCTATGAGATCTATG                                                   | ApaL I                    |
| BGO504 | pBG369                | CATAGATCTCATAGGTGCATTTGCTTCAAATGACAAG                                                    | ApaL I                    |
| BGO505 | pBG370                | CAAGGACCTCCATTTGCCGCCTCGGCCAGTGACAGAAC                                                   | Bgl I                     |
| BGO506 | pBG370                | GTTCTGTCACTGGCCGAGGCGGCAAATGGAGGTCTTG                                                    | Bgl I                     |
| BGO507 | pBG371                | CAGAACACACCACGCACAAGGCTCAGCTGTCAGGGATGTTG                                                | Pvu II                    |
| BGO508 | pBG371                | CAACATCCC TGACAGCTGAGCCTTGTGCGTGGTGTGTTCTG                                               | Pvu II                    |
| BGO509 | pBG372                | GTTGAATTTTACCTGCCTCGGGTGAATTTGTTATTAC                                                    | Ava I                     |
| BGO510 | pBG372                | GTAATAACAAATTCACCCGAGGCAGGTGAAAATTC AAC                                                  | Ava I                     |
| BGO511 | pBG373                | GAAAGATTTCTTGCTTTGCCGGCGCATCAGGTGAGTTTC                                                  | Nae I                     |
| BGO541 | pBG373                | GAAACTCACCTGATGCGCCGGCAAAGCAAGAAATCTTTC                                                  | Nae I                     |
| BGO542 | pBG374                | CACTATCGTGGCTGGCCAGCCAAAAGTTTGCTAC                                                       | Eae I                     |
| BGO543 | pBG374                | GTAGCAAAC TTTTGCTGGCCAGCCACGATAGTG                                                       | Eae I                     |
| BGO544 | pBG375                | CATTAGTGGTCATAACGCCGGCATTACTGCTTTGACAG                                                   | Nae I                     |
| BGO545 | pBG375                | CTGTCAAAGCAGTAATGCCGGCGTTATGACCACTAATG                                                   | Nae I                     |
| BGO546 | pBG376                | CCACTAATCAGTGGATCCTATGCTGGTAGGATTATGG                                                    | BamH I                    |
| BGO547 | pBG376                | CCATAATCCTACCAGCATAGGATCCACTGATTAGTGG                                                    | BamH I                    |
| BGO548 | pBG377                | GTATTTCTTGGGATGCCACTTTGGCAGTGAACGGTATTAC                                                 | Bgl I                     |
| BGO549 | pBG377                | GTAATACCGTTC ACTGCCAAAGTGGCATCCCAAGAAATAC                                                | Bgl I                     |
| BGO550 | pBG378                | CAGTTGGTTTGGAAAGCCGGCAATACTATT CAGGTATTC                                                 | Nae I                     |
| BGO551 | pBG378                | GAATACCTGAATAGTATTGCCGGCTTCCAAACCAACTG                                                   | Nae I                     |
| BGO552 | pBG379                | CGCCATCTGAAACAGCGATCGCTGCTGGAG                                                           | Pvu I                     |
| BGO553 | pBG379                | CTCCAGCAGCGATCGCTGTTTTCAGATGGCG                                                          | Pvu I                     |
| BGO554 | pBG380                | GAGATGTTATGGGCGCCATATTGCTATATGATTTAC                                                     | BsaH I                    |
| BGO555 | pBG380                | GTAAATCATATAGCAATATGGCGCCATAACATCTC                                                      | BsaH                      |
| BGO556 | pBG381                | GGGCTTTCCACACTAGTGCAATCAACGCCATTTC                                                       | Spe I                     |
| BGO557 | pBG381                | GAAATGGCGTTGATTGCACTAGTGTGAAAAGCC                                                        | Spe I                     |
| BGO558 | pBG382                | GAAAAGGGAGCAAACGCAGCGGCAATTGCAGCGGCCTTAGTTGCCACT                                         | Mfe I                     |
| BGO559 | pBG382                | CAGTGGCAACTAAGGCCGCTGCAATTGCCGCTGCGTTTGTCTCCCTTTTCGGGACTTCTATTAGTGATGGG                  | Mfe I                     |
| BGO563 | pBG383                | CCTTAAACTTCTATGAATGAGTTCATGACGAGGTTTTAAAAACC                                             | BspH I                    |
| BGO564 | pBG384                | GGTTTTTAAAACTCTGTCATGACCTCATT CATAGAAGTTTAAGG                                            | BspH I                    |
| BGO565 | pBG003,<br>pBG403-423 | CCATCTCCAAAATCGGATCTGCTGTTGGTGGTGGTGGTCTGGTTCCGCGTGGATCCATG<br>TCATCTATCTTTGAAGG         | BamH I                    |
| BGO566 | pBG003,<br>pBG403-423 | CCGTCATCACCGAAAACGCGGAGGCAGATCGTCAGTCAGTCACGATGAATTAAGCTTTCA<br>CTCGAGGACAACATTCACC      | Hind III                  |
| BGO599 | pBG443                | GTCATCTATCTTTTGAAGGAAATTATACCACCTCAGGCTGCTGCTGCTACCTTAAAC<br>TTCTATGAACTTGGACATGACGAGG   | XhoI                      |
| BGO600 | pBG443                | CCTCGTCATGTCCAAGTTCATAGAAAGTTAAGGTAGCAGCAGCAGCAGCCTGAGGTGGTA<br>TAATTTCTTCAAAGAGATAGATGA | XhoI                      |
| BGO675 | pBG606-607            | CATGCCATGGCGATGTCATCTATCTTTTGAAGGAAA                                                     | Nco I                     |
| BGO676 | pBG606-607            | CGCGGATCCTCACTCGAGGACAACATTCACCTTT                                                       | BamH I                    |
