# Supplementary material
Source: PubMed Central journal article supplement (PMC1483024)

Figure S1 (Okada et al.)

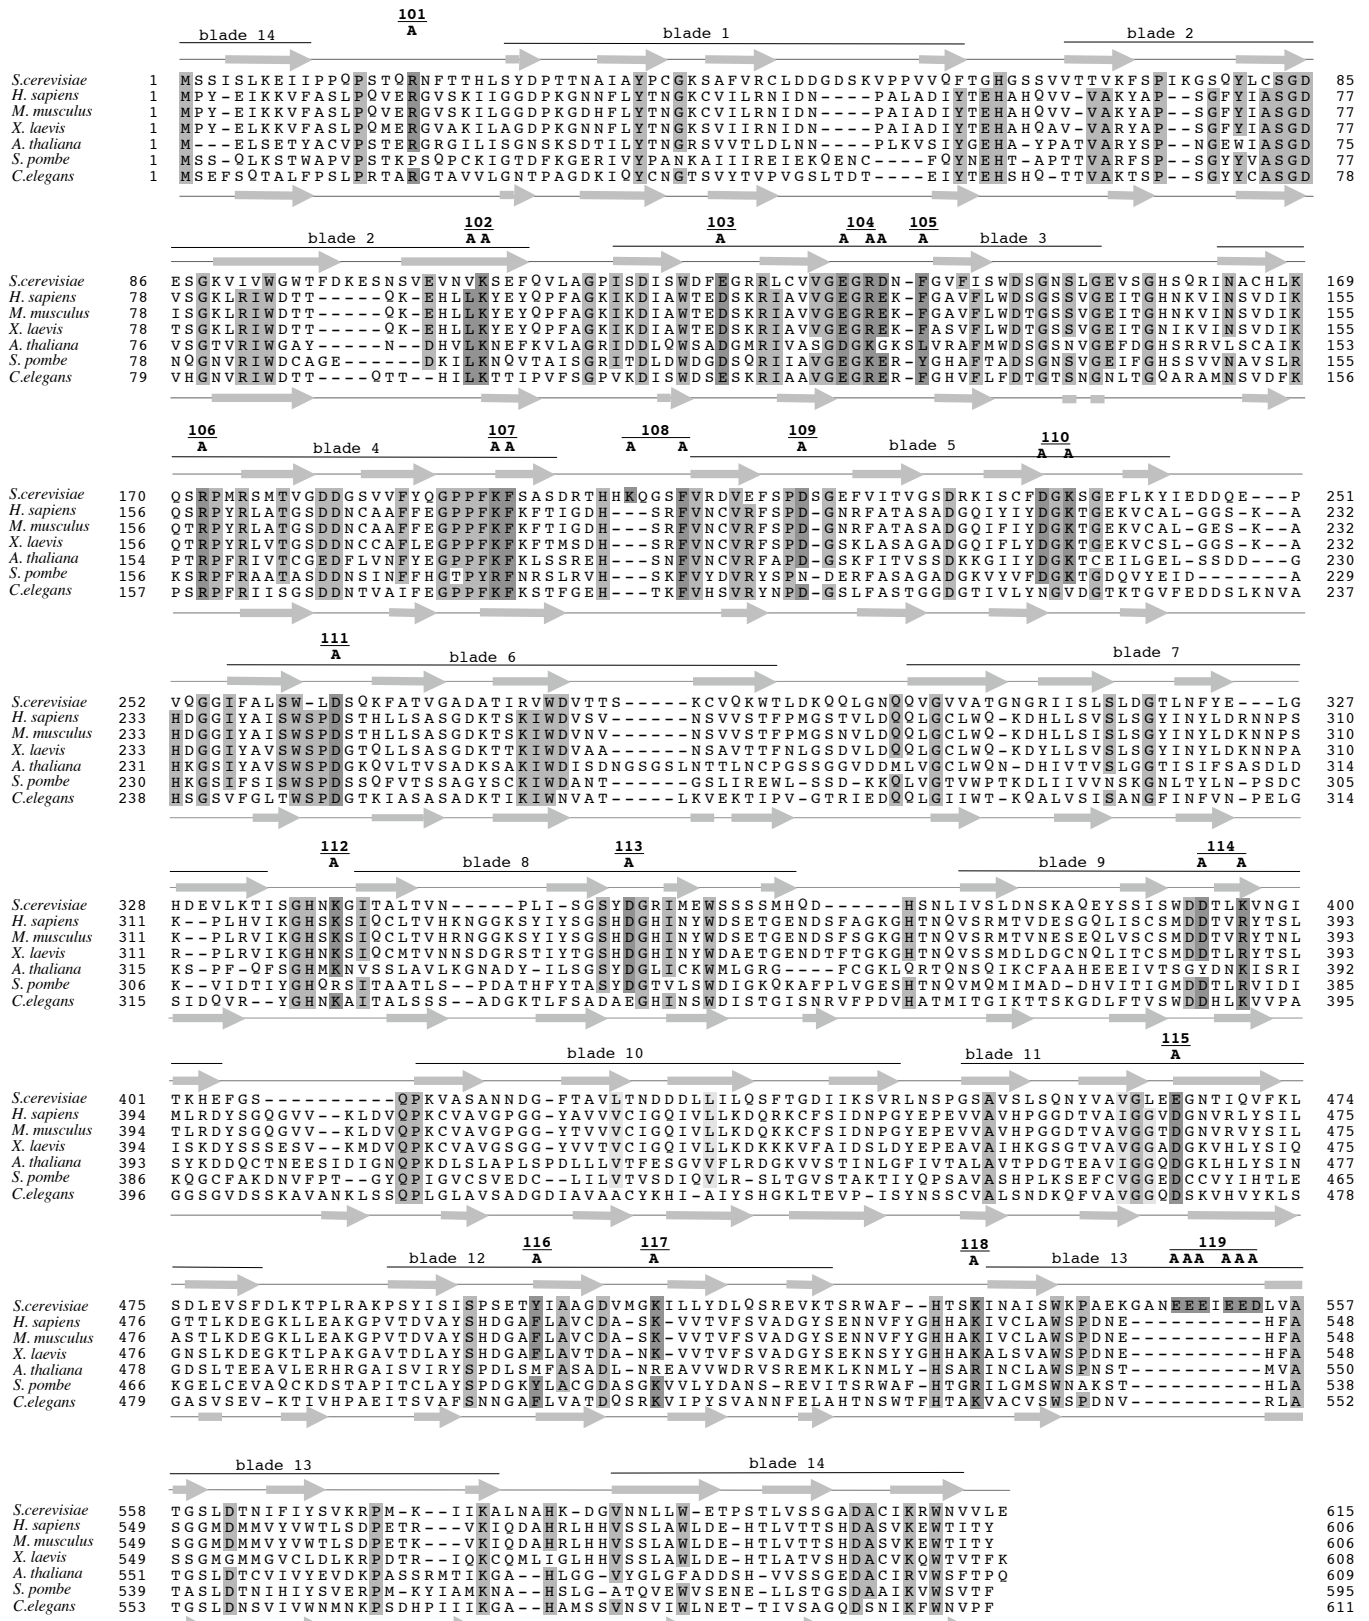

Supplement: mbc_E06-02-0135_1.pdf [file mbc_E06-02-0135_1.pdf]

Figure S2 (Okada et al.)

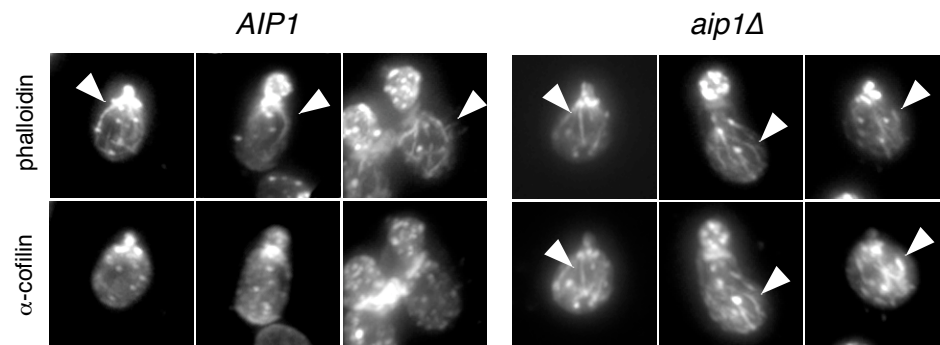

Supplement: mbc_E06-02-0135_2.pdf [file mbc_E06-02-0135_2.pdf]

Figure S3 (Okada et al.)

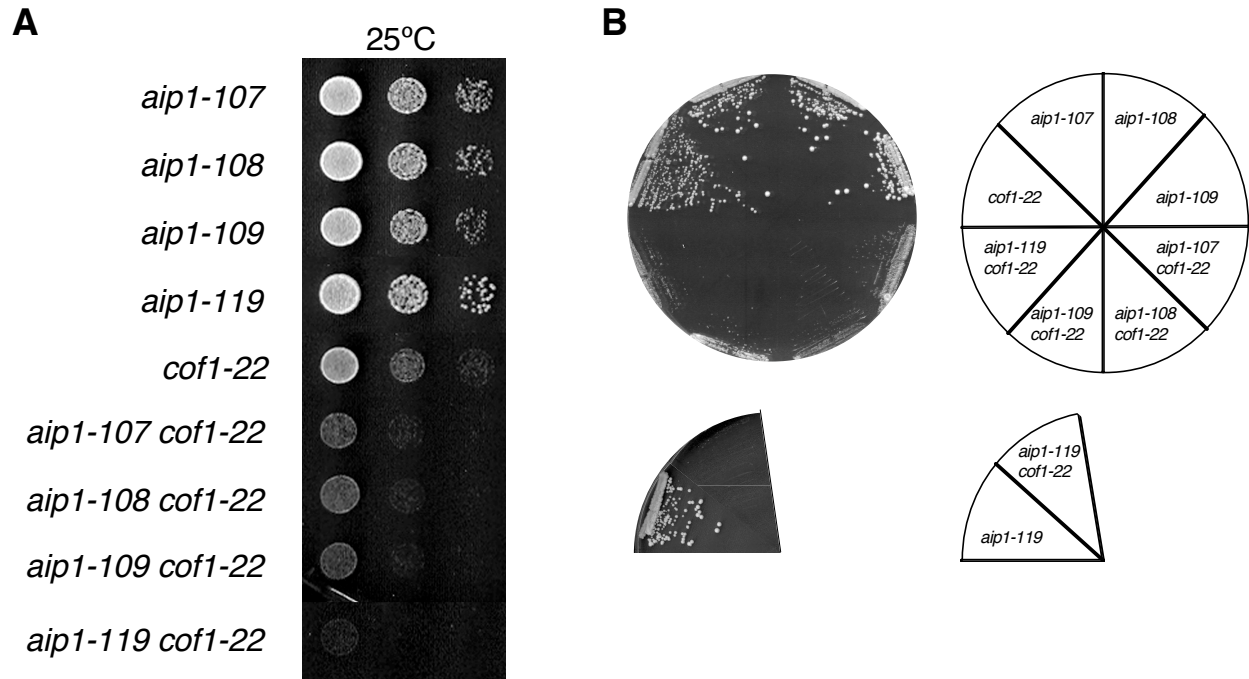

Supplement: mbc_E06-02-0135_3.pdf [file mbc_E06-02-0135_3.pdf]

Figure S4 (Okada et al.)

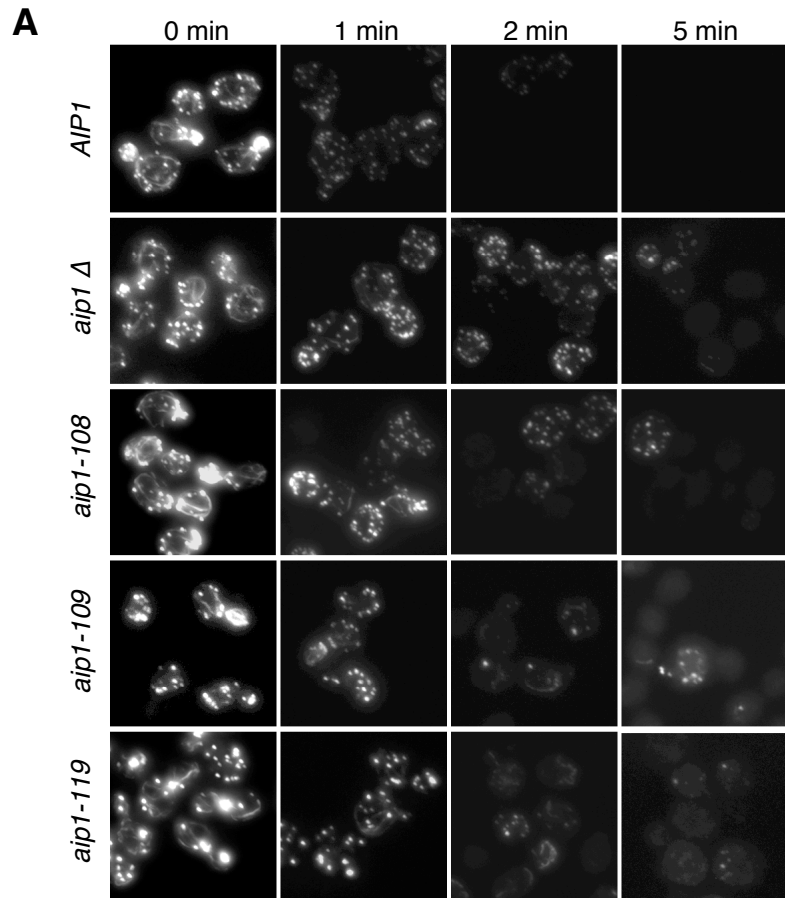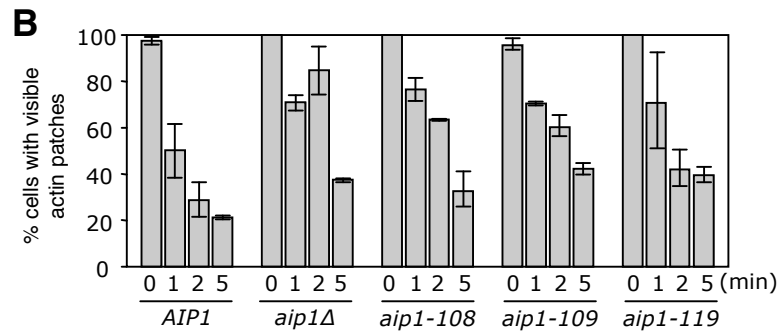

Supplement: mbc_E06-02-0135_4.pdf [file mbc_E06-02-0135_4.pdf]

Figure S5 (Okada et al.)

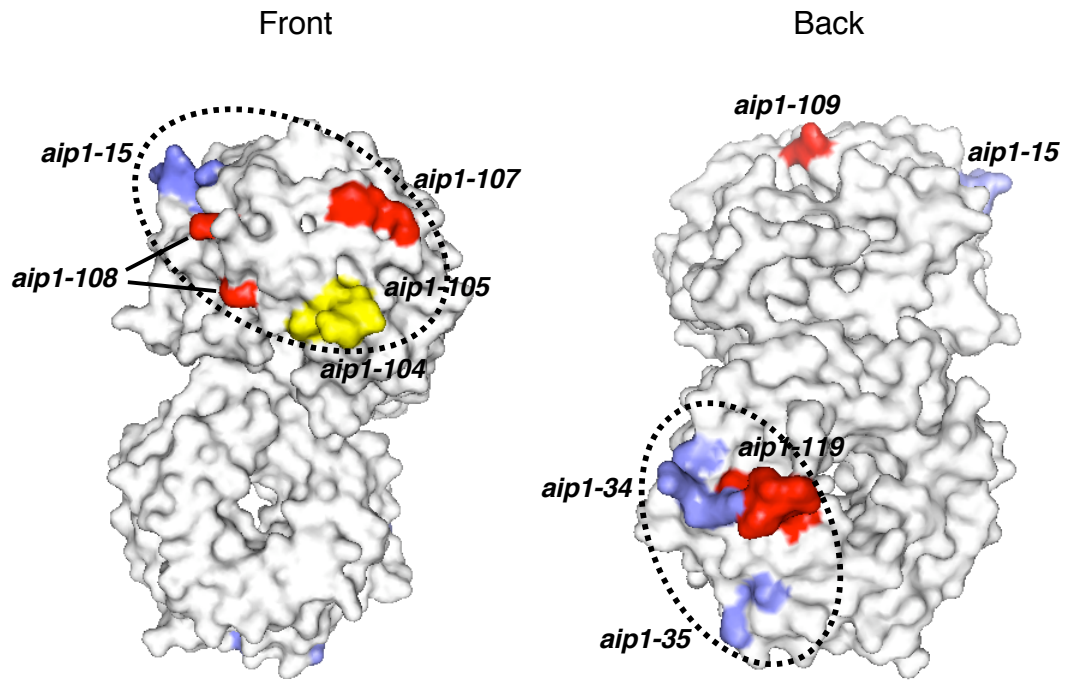

Supplement: mbc_E06-02-0135_5.pdf [file mbc_E06-02-0135_5.pdf]
